# Supplementary material for: From an Al4-Cluster to Al+ Complexes: Lessons on Metalloidal Clustering
Source: Research Square preprint supplement (doi:10.21203/rs.3.rs-1127590/v1), 2022-01-13

## checkCIF/PLATON report

Structure factors have been supplied for datablock(s) Pna21\_a

THIS REPORT IS FOR GUIDANCE ONLY. IF USED AS PART OF A REVIEW PROCEDURE FOR PUBLICATION, IT SHOULD NOT REPLACE THE EXPERTISE OF AN EXPERIENCED CRYSTALLOGRAPHIC REFEREE.

No syntax errors found.      CIF dictionary      Interpreting this report

### Datablock: Pna21\_a

---

Bond precision:      C-C = 0.0042 Å      Wavelength=0.71073

Cell:                      a=34.914 (7)              b=11.175 (2)              c=17.505 (4)  
                                alpha=90              beta=90              gamma=90

Temperature:              100 K

|             | Calculated                     | Reported                               |
|-------------|--------------------------------|----------------------------------------|
| Volume      | 6830 (2)                       | 6830 (2)                               |
| Space group | P n a 21                       | P n a 21                               |
| Hall group  | P 2c -2n                       | P 2c -2n                               |
|             | C15.99 Al                      |                                        |
| Moiety      | F35.97 O4, C16                 | [ (TMEDA) AL (ALCP*) 3] [AL (OC4F9) 4] |
| formula     | H31 Al2 N2,<br>2 (C10 H15 Al)  |                                        |
| Sum formula | C51.99 H61 Al5<br>F35.97 N2 O4 | C52 H61 Al5 F36 N2 O4                  |
| Mr          | 1596.22                        | 1596.37                                |
| Dx, g cm-3  | 1.552                          | 1.552                                  |
| Z           | 4                              | 4                                      |
| Mu (mm-1)   | 0.223                          | 0.223                                  |
| F000        | 3230.6                         | 3231.0                                 |
| F000'       | 3234.84                        |                                        |
| h, k, lmax  | 49, 15, 25                     | 49, 15, 25                             |
| Nref        | 20873 [ 10748]                 | 20768                                  |
| Tmin, Tmax  | 0.941, 0.964                   | 0.723, 0.746                           |
| Tmin'       | 0.906                          |                                        |

Correction method= # Reported T Limits: Tmin=0.723 Tmax=0.746  
AbsCorr = MULTI-SCAN

Data completeness= 1.93/0.99      Theta(max)= 30.530

R(reflections)= 0.0373( 17167)

wR2(reflections)=  
0.0933( 20768)

S = 1.018

Npar= 1675

The following ALERTS were generated. Each ALERT has the format

**test-name\_ALERT\_alert-type\_alert-level.**

Click on the hyperlinks for more details of the test.

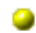

#### Alert level C

|                   |                                                  |              |
|-------------------|--------------------------------------------------|--------------|
| PLAT041_ALERT_1_C | Calc. and Reported SumFormula Strings Differ     | Please Check |
| PLAT089_ALERT_3_C | Poor Data / Parameter Ratio (Zmax < 18) .....    | 6.40 Note    |
| PLAT213_ALERT_2_C | Atom F4_7 has ADP max/min Ratio .....            | 3.1 prolat   |
| PLAT242_ALERT_2_C | Low 'MainMol' Ueq as Compared to Neighbors of    | Al02 Check   |
| PLAT250_ALERT_2_C | Large U3/U1 Ratio for Average U(i,j) Tensor .... | 2.8 Note     |
| PLAT340_ALERT_3_C | Low Bond Precision on C-C Bonds .....            | 0.00416 Ang. |
| PLAT601_ALERT_2_C | Unit Cell Contains Solvent Accessible VOIDS of . | 39 Ang**3    |
| PLAT911_ALERT_3_C | Missing FCF Refl Between Thmin & Sth/L= 0.600    | 8 Report     |
| PLAT913_ALERT_3_C | Missing # of Very Strong Reflections in FCF .... | 6 Note       |

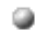

#### Alert level G

FORMU01\_ALERT\_1\_G There is a discrepancy between the atom counts in the  
\_chemical\_formula\_sum and \_chemical\_formula\_moiety. This is  
usually due to the moiety formula being in the wrong format.  
Atom count from \_chemical\_formula\_sum: C52 H61 Al5 F36 N2 O4  
Atom count from \_chemical\_formula\_moiety:

FORMU01\_ALERT\_2\_G There is a discrepancy between the atom counts in the  
\_chemical\_formula\_sum and the formula from the \_atom\_site\* data.  
Atom count from \_chemical\_formula\_sum: C52 H61 Al5 F36 N2 O4  
Atom count from the \_atom\_site data: C51.988 H61 Al5 F35.97297 N2 O4.

CELLZ01\_ALERT\_1\_G Difference between formula and atom\_site contents detected.

CELLZ01\_ALERT\_1\_G ALERT: check formula stoichiometry or atom site occupancies.  
From the CIF: \_cell\_formula\_units\_Z 4  
From the CIF: \_chemical\_formula\_sum C52 H61 Al5 F36 N2 O4  
TEST: Compare cell contents of formula and atom\_site data

| atom | Z*formula | cif sites | diff |
|------|-----------|-----------|------|
| C    | 208.00    | 207.95    | 0.05 |
| H    | 244.00    | 244.00    | 0.00 |
| Al   | 20.00     | 20.00     | 0.00 |
| F    | 144.00    | 143.89    | 0.11 |
| N    | 8.00      | 8.00      | 0.00 |
| O    | 16.00     | 15.99     | 0.01 |

|                   |                                                  |              |
|-------------------|--------------------------------------------------|--------------|
| PLAT002_ALERT_2_G | Number of Distance or Angle Restraints on AtSite | 170 Note     |
| PLAT003_ALERT_2_G | Number of Uiso or Uij Restrained non-H Atoms ... | 170 Report   |
| PLAT042_ALERT_1_G | Calc. and Reported Moiety Formula Strings Differ | Please Check |
| PLAT068_ALERT_1_G | Reported F000 Differs from Calcd (or Missing)... | Please Check |
| PLAT174_ALERT_4_G | The CIF-Embedded .res File Contains FLAT Records | 1 Report     |
| PLAT175_ALERT_4_G | The CIF-Embedded .res File Contains SAME Records | 2 Report     |
| PLAT176_ALERT_4_G | The CIF-Embedded .res File Contains SADI Records | 11 Report    |
| PLAT178_ALERT_4_G | The CIF-Embedded .res File Contains SIMU Records | 7 Report     |
| PLAT187_ALERT_4_G | The CIF-Embedded .res File Contains RIGU Records | 6 Report     |
| PLAT301_ALERT_3_G | Main Residue Disorder .....(Resd 1 )             | 98% Note     |
| PLAT304_ALERT_4_G | Non-Integer Number of Atoms in ..... (Resd 1 )   | 56.96 Check  |

|                                                                    |                  |             |
|--------------------------------------------------------------------|------------------|-------------|
| PLAT432_ALERT_2_G Short Inter X...Y Contact                        | F6_12 ..C9_10    | 2.95 Ang.   |
|                                                                    | 1/2+x,1/2-y,z =  | 3_555 Check |
| PLAT432_ALERT_2_G Short Inter X...Y Contact                        | F9_12 ..C6_10    | 2.92 Ang.   |
|                                                                    | 1-x,1-y,-1/2+z = | 2_664 Check |
| PLAT720_ALERT_4_G Number of Unusual/Non-Standard Labels .....      |                  | 220 Note    |
| PLAT811_ALERT_5_G No ADDSYM Analysis: Too Many Excluded Atoms .... |                  | ! Info      |
| PLAT860_ALERT_3_G Number of Least-Squares Restraints .....         |                  | 18750 Note  |
| PLAT910_ALERT_3_G Missing # of FCF Reflection(s) Below Theta(Min). |                  | 1 Note      |
| PLAT912_ALERT_4_G Missing # of FCF Reflections Above STh/L= 0.600  |                  | 19 Note     |
| PLAT955_ALERT_1_G Reported (CIF) and Actual (FCF) Lmax Differ by . |                  | 1 Units     |
| PLAT978_ALERT_2_G Number C-C Bonds with Positive Residual Density. |                  | 3 Info      |

---

0 **ALERT level A** = Most likely a serious problem - resolve or explain  
0 **ALERT level B** = A potentially serious problem, consider carefully  
9 **ALERT level C** = Check. Ensure it is not caused by an omission or oversight  
24 **ALERT level G** = General information/check it is not something unexpected

7 ALERT type 1 CIF construction/syntax error, inconsistent or missing data  
10 ALERT type 2 Indicator that the structure model may be wrong or deficient  
7 ALERT type 3 Indicator that the structure quality may be low  
8 ALERT type 4 Improvement, methodology, query or suggestion  
1 ALERT type 5 Informative message, check

---

## checkCIF publication errors

---

### Alert level A

PUBL004\_ALERT\_1\_A The contact author's name and address are missing,  
\_publ\_contact\_author\_name and \_publ\_contact\_author\_address.  
PUBL005\_ALERT\_1\_A \_publ\_contact\_author\_email, \_publ\_contact\_author\_fax and  
\_publ\_contact\_author\_phone are all missing.  
At least one of these should be present.  
PUBL006\_ALERT\_1\_A \_publ\_requested\_journal is missing  
e.g. 'Acta Crystallographica Section C'  
PUBL008\_ALERT\_1\_A \_publ\_section\_title is missing. Title of paper.  
PUBL009\_ALERT\_1\_A \_publ\_author\_name is missing. List of author(s) name(s).  
PUBL010\_ALERT\_1\_A \_publ\_author\_address is missing. Author(s) address(es).  
PUBL012\_ALERT\_1\_A \_publ\_section\_abstract is missing.  
Abstract of paper in English.

---

7 **ALERT level A** = Data missing that is essential or data in wrong format  
0 **ALERT level G** = General alerts. Data that may be required is missing

---

## Publication of your CIF

You should attempt to resolve as many as possible of the alerts in all categories. Often the minor alerts point to easily fixed oversights, errors and omissions in your CIF or refinement strategy, so attention to these fine details can be worthwhile. In order to resolve some of the more serious problems it may be necessary to carry out additional measurements or structure refinements. However, the nature of your study may justify the reported deviations from journal submission requirements and the more serious of these should be commented upon in the discussion or experimental section of a paper or in the "special\_details" fields of the CIF. *checkCIF* was carefully designed to identify outliers and unusual parameters, but every test has its limitations and alerts that are not important in a particular case may appear. Conversely, the absence of alerts does not guarantee there are no aspects of the results needing attention. It is up to the individual to critically assess their own results and, if necessary, seek expert advice.

If level A alerts remain, which you believe to be justified deviations, and you intend to submit this CIF for publication in a journal, you should additionally insert an explanation in your CIF using the Validation Reply Form (VRF) below. This will allow your explanation to be considered as part of the review process.

```
# start Validation Reply Form
_vrf_PUBL004_GLOBAL
;
PROBLEM: The contact author's name and address are missing,
RESPONSE: ...
;
_vrf_PUBL005_GLOBAL
;
PROBLEM: _publ_contact_author_email, _publ_contact_author_fax and
RESPONSE: ...
;
_vrf_PUBL006_GLOBAL
;
PROBLEM: _publ_requested_journal is missing
RESPONSE: ...
;
_vrf_PUBL008_GLOBAL
;
PROBLEM: _publ_section_title is missing. Title of paper.
RESPONSE: ...
;
_vrf_PUBL009_GLOBAL
;
PROBLEM: _publ_author_name is missing. List of author(s) name(s).
RESPONSE: ...
;
_vrf_PUBL010_GLOBAL
;
PROBLEM: _publ_author_address is missing. Author(s) address(es).
RESPONSE: ...
;
_vrf_PUBL012_GLOBAL
;
```

PROBLEM: \_publ\_section\_abstract is missing.

RESPONSE: ...

;

# end Validation Reply Form

If you wish to submit your CIF for publication in Acta Crystallographica Section C or E, you should upload your CIF via the web. If you wish to submit your CIF for publication in IUCrData you should upload your CIF via the web. If your CIF is to form part of a submission to another IUCr journal, you will be asked, either during electronic submission or by the Co-editor handling your paper, to upload your CIF via our web site.

---

**PLATON version of 18/12/2021; check.def file version of 18/12/2021**

Datablock Pna21\_a - ellipsoid plot

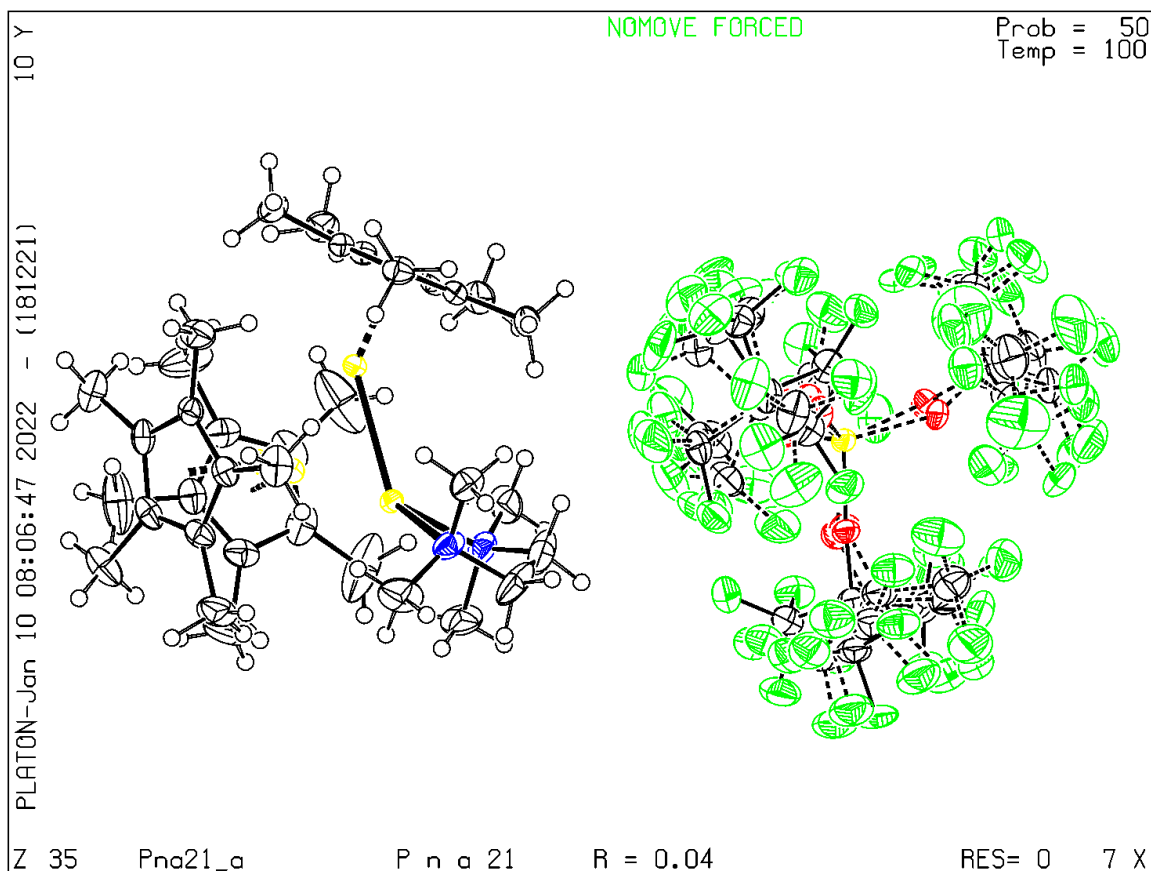

Supplement: Supplementary file 2 [file 96910e8296f38dfa8c641b4b.pdf]
