# Supplementary material for: From an Al4-Cluster to Al+ Complexes: Lessons on Metalloidal Clustering
Source: Research Square preprint supplement (doi:10.21203/rs.3.rs-1127590/v1), 2022-01-13

---

The following ALERTS were generated. Each ALERT has the format

**test-name\_ALERT\_alert-type\_alert-level.**

Click on the hyperlinks for more details of the test.

---

### Alert level C

|                   |                                                  |                |              |
|-------------------|--------------------------------------------------|----------------|--------------|
| PLAT041_ALERT_1_C | Calc. and Reported SumFormula                    | Strings Differ | Please Check |
| PLAT230_ALERT_2_C | Hirshfeld Test Diff for C1_13                    | --C5_13 .      | 5.3 s.u.     |
| PLAT242_ALERT_2_C | Low 'MainMol' Ueq as Compared to Neighbors of    |                | A14 Check    |
| PLAT250_ALERT_2_C | Large U3/U1 Ratio for Average U(i,j) Tensor .... |                | 2.4 Note     |
| PLAT250_ALERT_2_C | Large U3/U1 Ratio for Average U(i,j) Tensor .... |                | 2.1 Note     |
| PLAT250_ALERT_2_C | Large U3/U1 Ratio for Average U(i,j) Tensor .... |                | 2.1 Note     |
| PLAT250_ALERT_2_C | Large U3/U1 Ratio for Average U(i,j) Tensor .... |                | 2.4 Note     |
| PLAT340_ALERT_3_C | Low Bond Precision on C-C Bonds .....            |                | 0.00487 Ang. |
| PLAT413_ALERT_2_C | Short Inter XH3 .. XHn Hn_13 ..Hn_13 .           |                | 2.09 Ang.    |
|                   | 2-x,1-y,-z =                                     | 2_765          | Check        |
| PLAT601_ALERT_2_C | Unit Cell Contains Solvent Accessible VOIDS of . |                | 35 Ang**3    |
| PLAT906_ALERT_3_C | Large K Value in the Analysis of Variance .....  |                | 2.604 Check  |
| PLAT911_ALERT_3_C | Missing FCF Refl Between Thmin & STh/L=          | 0.597          | 43 Report    |

---

### Alert level G

FORMU01\_ALERT\_1\_G There is a discrepancy between the atom counts in the  
\_chemical\_formula\_sum and \_chemical\_formula\_moiety. This is  
usually due to the moiety formula being in the wrong format.  
Atom count from \_chemical\_formula\_sum: C52 H49 Al5 F38 O4  
Atom count from \_chemical\_formula\_moiety:

|                   |                                                  |        |        |
|-------------------|--------------------------------------------------|--------|--------|
| PLAT002_ALERT_2_G | Number of Distance or Angle Restraints on AtSite | 242    | Note   |
| PLAT003_ALERT_2_G | Number of Uiso or Uij Restrained non-H Atoms ... | 190    | Report |
| PLAT042_ALERT_1_G | Calc. and Reported Moiety Formula Strings Differ | Please | Check  |
| PLAT083_ALERT_2_G | SHELXL Second Parameter in WGHT Unusually Large  | 8.96   | Why ?  |
| PLAT174_ALERT_4_G | The CIF-Embedded .res File Contains FLAT Records | 2      | Report |
| PLAT175_ALERT_4_G | The CIF-Embedded .res File Contains SAME Records | 3      | Report |
| PLAT176_ALERT_4_G | The CIF-Embedded .res File Contains SADI Records | 15     | Report |
| PLAT178_ALERT_4_G | The CIF-Embedded .res File Contains SIMU Records | 11     | Report |
| PLAT187_ALERT_4_G | The CIF-Embedded .res File Contains RIGU Records | 13     | Report |
| PLAT242_ALERT_2_G | Low 'MainMol' Ueq as Compared to Neighbors of    | C2_2   | Check  |
| PLAT242_ALERT_2_G | Low 'MainMol' Ueq as Compared to Neighbors of    | C3_2   | Check  |
| PLAT242_ALERT_2_G | Low 'MainMol' Ueq as Compared to Neighbors of    | C4_2   | Check  |
| PLAT242_ALERT_2_G | Low 'MainMol' Ueq as Compared to Neighbors of    | C2_3   | Check  |
| PLAT242_ALERT_2_G | Low 'MainMol' Ueq as Compared to Neighbors of    | C3_3   | Check  |
| PLAT242_ALERT_2_G | Low 'MainMol' Ueq as Compared to Neighbors of    | C4_3   | Check  |
| PLAT242_ALERT_2_G | Low 'MainMol' Ueq as Compared to Neighbors of    | C2_4   | Check  |
| PLAT242_ALERT_2_G | Low 'MainMol' Ueq as Compared to Neighbors of    | C2_6   | Check  |
| PLAT242_ALERT_2_G | Low 'MainMol' Ueq as Compared to Neighbors of    | C3_6   | Check  |
| PLAT242_ALERT_2_G | Low 'MainMol' Ueq as Compared to Neighbors of    | C4_6   | Check  |
| PLAT242_ALERT_2_G | Low 'MainMol' Ueq as Compared to Neighbors of    | C2_8   | Check  |
| PLAT242_ALERT_2_G | Low 'MainMol' Ueq as Compared to Neighbors of    | C3_8   | Check  |
| PLAT242_ALERT_2_G | Low 'MainMol' Ueq as Compared to Neighbors of    | C4_8   | Check  |
| PLAT242_ALERT_2_G | Low 'MainMol' Ueq as Compared to Neighbors of    | C2_24  | Check  |
| PLAT242_ALERT_2_G | Low 'MainMol' Ueq as Compared to Neighbors of    | C3_24  | Check  |
| PLAT242_ALERT_2_G | Low 'MainMol' Ueq as Compared to Neighbors of    | C4_24  | Check  |
| PLAT301_ALERT_3_G | Main Residue Disorder .....(Resd 1 )             | 25%    | Note   |
| PLAT301_ALERT_3_G | Main Residue Disorder .....(Resd 2 )             | 25%    | Note   |
| PLAT302_ALERT_4_G | Anion/Solvent/Minor-Residue Disorder (Resd 3 )   | 29%    | Note   |
| PLAT302_ALERT_4_G | Anion/Solvent/Minor-Residue Disorder (Resd 5 )   | 100%   | Note   |

|                   |                                                  |           |             |
|-------------------|--------------------------------------------------|-----------|-------------|
| PLAT302_ALERT_4_G | Anion/Solvent/Minor-Residue Disorder             | (Resd 6 ) | 100% Note   |
| PLAT302_ALERT_4_G | Anion/Solvent/Minor-Residue Disorder             | (Resd 7 ) | 100% Note   |
| PLAT302_ALERT_4_G | Anion/Solvent/Minor-Residue Disorder             | (Resd 8 ) | 100% Note   |
| PLAT304_ALERT_4_G | Non-Integer Number of Atoms in .....             | (Resd 5 ) | 10.61 Check |
| PLAT304_ALERT_4_G | Non-Integer Number of Atoms in .....             | (Resd 6 ) | 8.75 Check  |
| PLAT304_ALERT_4_G | Non-Integer Number of Atoms in .....             | (Resd 7 ) | 3.25 Check  |
| PLAT304_ALERT_4_G | Non-Integer Number of Atoms in .....             | (Resd 8 ) | 1.39 Check  |
| PLAT434_ALERT_2_G | Short Inter HL..HL Contact F7_4 ..F3_16          |           | 2.76 Ang.   |
|                   | 1-x,1-y,1-z =                                    |           | 2_666 Check |
| PLAT434_ALERT_2_G | Short Inter HL..HL Contact F9_6 ..F1_20          |           | 2.82 Ang.   |
|                   | x,1+y,z =                                        |           | 1_565 Check |
| PLAT434_ALERT_2_G | Short Inter HL..HL Contact F5_24 ..F5_24         |           | 2.68 Ang.   |
|                   | -x,2-y,-z =                                      |           | 2_575 Check |
| PLAT720_ALERT_4_G | Number of Unusual/Non-Standard Labels .....      |           | 365 Note    |
| PLAT722_ALERT_1_G | Angle Calc 121.00, Rep 119.90 Dev...             |           | 1.10 Degree |
|                   | C2_21 -C3_21 -H_21 1_555 1_555 1_555 # 712       |           | Check       |
| PLAT811_ALERT_5_G | No ADDSYM Analysis: Too Many Excluded Atoms .... |           | ! Info      |
| PLAT860_ALERT_3_G | Number of Least-Squares Restraints .....         |           | 22815 Note  |
| PLAT909_ALERT_3_G | Percentage of I>2sig(I) Data at Theta(Max) Still |           | 47% Note    |
| PLAT933_ALERT_2_G | Number of HKL-OMIT Records in Embedded .res File |           | 2 Note      |
| PLAT978_ALERT_2_G | Number C-C Bonds with Positive Residual Density. |           | 3 Info      |

---

0 **ALERT level A** = Most likely a serious problem - resolve or explain  
 0 **ALERT level B** = A potentially serious problem, consider carefully  
 12 **ALERT level C** = Check. Ensure it is not caused by an omission or oversight  
 47 **ALERT level G** = General information/check it is not something unexpected

4 ALERT type 1 CIF construction/syntax error, inconsistent or missing data  
 32 ALERT type 2 Indicator that the structure model may be wrong or deficient  
 7 ALERT type 3 Indicator that the structure quality may be low  
 15 ALERT type 4 Improvement, methodology, query or suggestion  
 1 ALERT type 5 Informative message, check

---

It is advisable to attempt to resolve as many as possible of the alerts in all categories. Often the minor alerts point to easily fixed oversights, errors and omissions in your CIF or refinement strategy, so attention to these fine details can be worthwhile. In order to resolve some of the more serious problems it may be necessary to carry out additional measurements or structure refinements. However, the purpose of your study may justify the reported deviations and the more serious of these should normally be commented upon in the discussion or experimental section of a paper or in the "special\_details" fields of the CIF. checkCIF was carefully designed to identify outliers and unusual parameters, but every test has its limitations and alerts that are not important in a particular case may appear. Conversely, the absence of alerts does not guarantee there are no aspects of the results needing attention. It is up to the individual to critically assess their own results and, if necessary, seek expert advice.

### **Publication of your CIF in IUCr journals**

A basic structural check has been run on your CIF. These basic checks will be run on all CIFs submitted for publication in IUCr journals (*Acta Crystallographica*, *Journal of Applied Crystallography*, *Journal of Synchrotron Radiation*); however, if you intend to submit to *Acta Crystallographica Section C* or *E* or *IUCrData*, you should make sure that full publication checks are run on the final version of your CIF prior to submission.

### **Publication of your CIF in other journals**

Please refer to the *Notes for Authors* of the relevant journal for any special instructions relating to CIF submission.

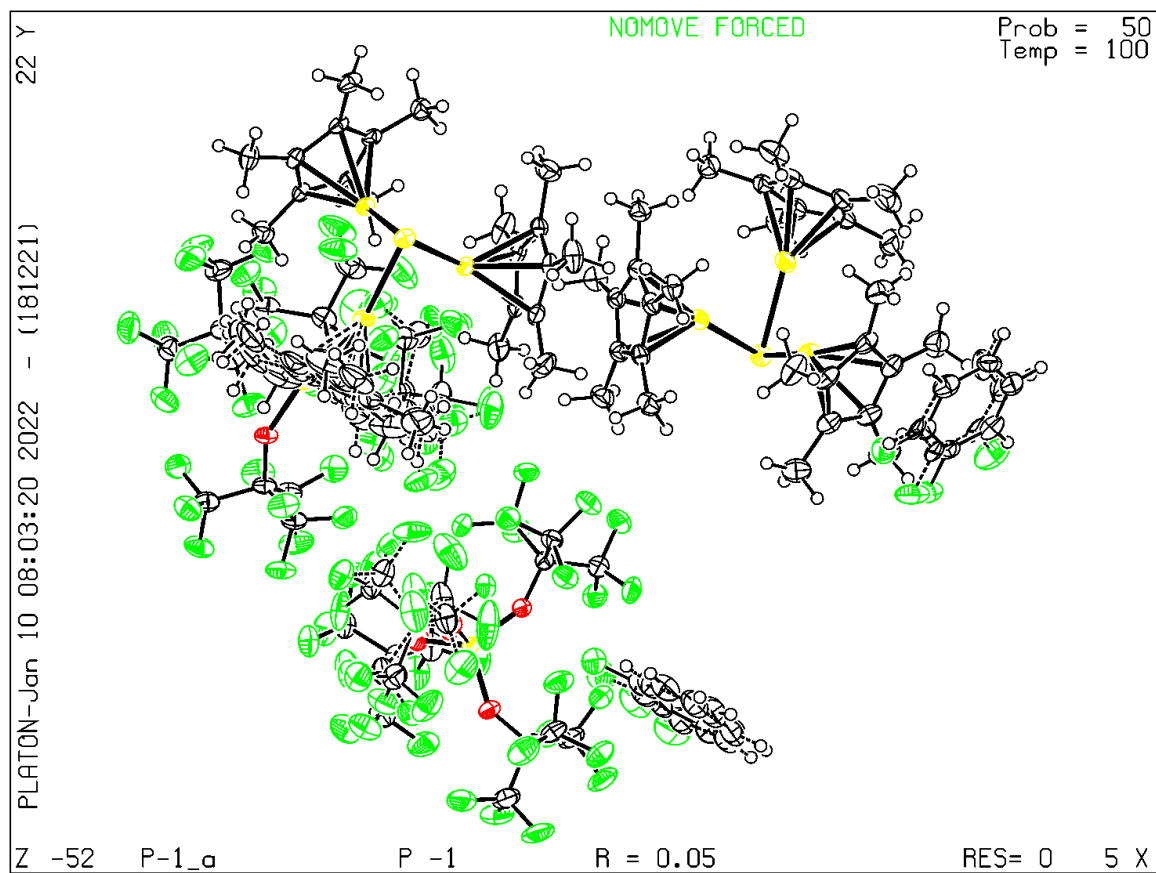

Supplement: Supplementary file 3 [file a82397012a1e1140cf85bdec.pdf]
