# Supplementary material for: From an Al4-Cluster to Al+ Complexes: Lessons on Metalloidal Clustering
Source: Research Square preprint supplement (doi:10.21203/rs.3.rs-1127590/v1), 2022-01-13

## checkCIF/PLATON report

Structure factors have been supplied for datablock(s) P21c\_a

THIS REPORT IS FOR GUIDANCE ONLY. IF USED AS PART OF A REVIEW PROCEDURE FOR PUBLICATION, IT SHOULD NOT REPLACE THE EXPERTISE OF AN EXPERIENCED CRYSTALLOGRAPHIC REFEREE.

No syntax errors found.      CIF dictionary      Interpreting this report

### Datablock: P21c\_a

---

|                 |                                                                                               |                                        |              |
|-----------------|-----------------------------------------------------------------------------------------------|----------------------------------------|--------------|
| Bond precision: | C-C = 0.0030 A                                                                                | Wavelength=0.71073                     |              |
| Cell:           | a=16.361 (4)                                                                                  | b=32.286 (10)                          | c=18.454 (4) |
|                 | alpha=90                                                                                      | beta=109.236 (10)                      | gamma=90     |
| Temperature:    | 100 K                                                                                         |                                        |              |
|                 | Calculated                                                                                    | Reported                               |              |
| Volume          | 9204 (4)                                                                                      | 9204 (4)                               |              |
| Space group     | P 21/c                                                                                        | P 21/c                                 |              |
| Hall group      | -P 2ybc                                                                                       | -P 2ybc                                |              |
| Moiety formula  | C16 Al F36 O4,<br>C30 H45 Al3,<br>C21 H30 Al N6,<br>0.664 (C6 H4<br>F2), 0.8<br>C75.10 H86.72 | [ (DMAP) 3AL (ALCP*) 3] [AL (OC4F9) 4] |              |
| Sum formula     | Al5 F37.33 N6<br>O4                                                                           | C75.10 H86.72 Al5 F37.33 N6 O4         |              |
| Mr              | 1981.60                                                                                       | 1981.57                                |              |
| Dx, g cm-3      | 1.430                                                                                         | 1.430                                  |              |
| Z               | 4                                                                                             | 4                                      |              |
| Mu (mm-1)       | 0.184                                                                                         | 0.184                                  |              |
| F000            | 4049.2                                                                                        | 4049.0                                 |              |
| F000'           | 4053.71                                                                                       |                                        |              |
| h, k, lmax      | 20, 40, 23                                                                                    | 20, 40, 23                             |              |
| Nref            | 18899                                                                                         | 18867                                  |              |
| Tmin, Tmax      | 0.957, 0.975                                                                                  | 0.711, 0.745                           |              |
| Tmin'           | 0.939                                                                                         |                                        |              |

Correction method= # Reported T Limits: Tmin=0.711 Tmax=0.745  
AbsCorr = MULTI-SCAN

Data completeness= 0.998

Theta(max)= 26.405

R(reflections)= 0.0413( 14979)

wR2(reflections)=  
0.1174( 18867)

S = 1.030

Npar= 1978

---

The following ALERTS were generated. Each ALERT has the format

**test-name\_ALERT\_alert-type\_alert-level.**

Click on the hyperlinks for more details of the test.

---

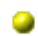

### Alert level C

|                   |                                                  |       |        |
|-------------------|--------------------------------------------------|-------|--------|
| PLAT088_ALERT_3_C | Poor Data / Parameter Ratio .....                | 9.54  | Note   |
| PLAT094_ALERT_2_C | Ratio of Maximum / Minimum Residual Density .... | 2.76  | Report |
| PLAT260_ALERT_2_C | Large Average Ueq of Residue Including C1_6      | 0.102 | Check  |
| PLAT334_ALERT_2_C | Small Aver. Benzene C-C Dist C1_24 -C6_24        | 1.36  | Ang.   |
| PLAT334_ALERT_2_C | Small Aver. Benzene C-C Dist C1_23 -C6_23        | 1.36  | Ang.   |
| PLAT601_ALERT_2_C | Unit Cell Contains Solvent Accessible VOIDS of . | 62    | Ang**3 |
| PLAT911_ALERT_3_C | Missing FCF Refl Between Thmin & STh/L= 0.600    | 7     | Report |

---

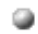

### Alert level G

FORMU01\_ALERT\_1\_G There is a discrepancy between the atom counts in the  
\_chemical\_formula\_sum and \_chemical\_formula\_moiety. This is  
usually due to the moiety formula being in the wrong format.  
Atom count from \_chemical\_formula\_sum: C75.1 H86.72 Al5 F37.33 N6 O4  
Atom count from \_chemical\_formula\_moiety:

|                   |                                                             |       |              |
|-------------------|-------------------------------------------------------------|-------|--------------|
| PLAT002_ALERT_2_G | Number of Distance or Angle Restraints on AtSite            | 201   | Note         |
| PLAT003_ALERT_2_G | Number of Uiso or Uij Restrained non-H Atoms ...            | 201   | Report       |
| PLAT042_ALERT_1_G | Calc. and Reported Moiety Formula Strings Differ            |       | Please Check |
| PLAT068_ALERT_1_G | Reported F000 Differs from Calcd (or Missing)...            |       | Please Check |
| PLAT083_ALERT_2_G | SHELXL Second Parameter in WGHT Unusually Large             | 5.65  | Why ?        |
| PLAT174_ALERT_4_G | The CIF-Embedded .res File Contains FLAT Records            | 3     | Report       |
| PLAT175_ALERT_4_G | The CIF-Embedded .res File Contains SAME Records            | 5     | Report       |
| PLAT176_ALERT_4_G | The CIF-Embedded .res File Contains SADI Records            | 21    | Report       |
| PLAT178_ALERT_4_G | The CIF-Embedded .res File Contains SIMU Records            | 14    | Report       |
| PLAT187_ALERT_4_G | The CIF-Embedded .res File Contains RIGU Records            | 13    | Report       |
| PLAT301_ALERT_3_G | Main Residue Disorder .....(Resd 1 )                        | 98%   | Note         |
| PLAT302_ALERT_4_G | Anion/Solvent/Minor-Residue Disorder (Resd 2 )              | 61%   | Note         |
| PLAT302_ALERT_4_G | Anion/Solvent/Minor-Residue Disorder (Resd 4 )              | 100%  | Note         |
| PLAT302_ALERT_4_G | Anion/Solvent/Minor-Residue Disorder (Resd 5 )              | 100%  | Note         |
| PLAT302_ALERT_4_G | Anion/Solvent/Minor-Residue Disorder (Resd 6 )              | 100%  | Note         |
| PLAT304_ALERT_4_G | Non-Integer Number of Atoms in ..... (Resd 4 )              | 3.26  | Check        |
| PLAT304_ALERT_4_G | Non-Integer Number of Atoms in ..... (Resd 5 )              | 4.70  | Check        |
| PLAT304_ALERT_4_G | Non-Integer Number of Atoms in ..... (Resd 6 )              | 13.18 | Check        |
| PLAT380_ALERT_4_G | Incorrectly? Oriented X(sp2)-Methyl Moiety .....            | C6_10 | Check        |
| PLAT380_ALERT_4_G | Incorrectly? Oriented X(sp2)-Methyl Moiety .....            | C6_21 | Check        |
| PLAT413_ALERT_2_G | Short Inter XH3 .. XHn H5_8 ..H7B_22 .<br>x,y,z =           | 2.09  | Ang.         |
|                   |                                                             | 1_555 | Check        |
| PLAT720_ALERT_4_G | Number of Unusual/Non-Standard Labels .....                 | 307   | Note         |
| PLAT790_ALERT_4_G | Centre of Gravity not Within Unit Cell: Resd. #<br>C6 H4 F2 | 4     | Note         |
| PLAT790_ALERT_4_G | Centre of Gravity not Within Unit Cell: Resd. #<br>C5 H11   | 6     | Note         |

|                   |                                                  |       |      |
|-------------------|--------------------------------------------------|-------|------|
| PLAT811_ALERT_5_G | No ADDSYM Analysis: Too Many Excluded Atoms .... | !     | Info |
| PLAT860_ALERT_3_G | Number of Least-Squares Restraints .....         | 16307 | Note |
| PLAT910_ALERT_3_G | Missing # of FCF Reflection(s) Below Theta(Min). | 3     | Note |
| PLAT912_ALERT_4_G | Missing # of FCF Reflections Above STh/L= 0.600  | 25    | Note |
| PLAT913_ALERT_3_G | Missing # of Very Strong Reflections in FCF .... | 1     | Note |
| PLAT933_ALERT_2_G | Number of HKL-OMIT Records in Embedded .res File | 9     | Note |
| PLAT978_ALERT_2_G | Number C-C Bonds with Positive Residual Density. | 4     | Info |

---

0 **ALERT level A** = Most likely a serious problem - resolve or explain  
 0 **ALERT level B** = A potentially serious problem, consider carefully  
 7 **ALERT level C** = Check. Ensure it is not caused by an omission or oversight  
 32 **ALERT level G** = General information/check it is not something unexpected

3 ALERT type 1 CIF construction/syntax error, inconsistent or missing data  
 11 ALERT type 2 Indicator that the structure model may be wrong or deficient  
 6 ALERT type 3 Indicator that the structure quality may be low  
 18 ALERT type 4 Improvement, methodology, query or suggestion  
 1 ALERT type 5 Informative message, check

---

## checkCIF publication errors

---

### Alert level A

PUBL004\_ALERT\_1\_A The contact author's name and address are missing,  
     \_publ\_contact\_author\_name and \_publ\_contact\_author\_address.  
 PUBL005\_ALERT\_1\_A \_publ\_contact\_author\_email, \_publ\_contact\_author\_fax and  
     \_publ\_contact\_author\_phone are all missing.  
     At least one of these should be present.  
 PUBL006\_ALERT\_1\_A \_publ\_requested\_journal is missing  
     e.g. 'Acta Crystallographica Section C'  
 PUBL008\_ALERT\_1\_A \_publ\_section\_title is missing. Title of paper.  
 PUBL009\_ALERT\_1\_A \_publ\_author\_name is missing. List of author(s) name(s).  
 PUBL010\_ALERT\_1\_A \_publ\_author\_address is missing. Author(s) address(es).  
 PUBL012\_ALERT\_1\_A \_publ\_section\_abstract is missing.  
     Abstract of paper in English.

---

7 **ALERT level A** = Data missing that is essential or data in wrong format  
 0 **ALERT level G** = General alerts. Data that may be required is missing

---

## Publication of your CIF

You should attempt to resolve as many as possible of the alerts in all categories. Often the minor alerts point to easily fixed oversights, errors and omissions in your CIF or refinement strategy, so attention to these fine details can be worthwhile. In order to resolve some of the more serious problems it may be necessary to carry out additional measurements or structure refinements. However, the nature of your study may justify the reported deviations from journal submission requirements and the more serious of these should be commented upon in the discussion or experimental section of a paper or in the "special\_details" fields of the CIF. *checkCIF* was carefully designed to identify outliers and unusual parameters, but every test has its limitations and alerts that are not important in a particular case may appear. Conversely, the absence of alerts does not guarantee there are no aspects of the results needing attention. It is up to the individual to critically assess their own results and, if necessary, seek expert advice.

If level A alerts remain, which you believe to be justified deviations, and you intend to submit this CIF for publication in a journal, you should additionally insert an explanation in your CIF using the Validation Reply Form (VRF) below. This will allow your explanation to be considered as part of the review process.

```
# start Validation Reply Form
_vrf_PUBL004_GLOBAL
;
PROBLEM: The contact author's name and address are missing,
RESPONSE: ...
;
_vrf_PUBL005_GLOBAL
;
PROBLEM: _publ_contact_author_email, _publ_contact_author_fax and
RESPONSE: ...
;
_vrf_PUBL006_GLOBAL
;
PROBLEM: _publ_requested_journal is missing
RESPONSE: ...
;
_vrf_PUBL008_GLOBAL
;
PROBLEM: _publ_section_title is missing. Title of paper.
RESPONSE: ...
;
_vrf_PUBL009_GLOBAL
;
PROBLEM: _publ_author_name is missing. List of author(s) name(s).
RESPONSE: ...
;
_vrf_PUBL010_GLOBAL
;
PROBLEM: _publ_author_address is missing. Author(s) address(es).
RESPONSE: ...
;
_vrf_PUBL012_GLOBAL
;
```

PROBLEM: \_publ\_section\_abstract is missing.

RESPONSE: ...

;

# end Validation Reply Form

If you wish to submit your CIF for publication in Acta Crystallographica Section C or E, you should upload your CIF via the web. If you wish to submit your CIF for publication in IUCrData you should upload your CIF via the web. If your CIF is to form part of a submission to another IUCr journal, you will be asked, either during electronic submission or by the Co-editor handling your paper, to upload your CIF via our web site.

---

**PLATON version of 18/12/2021; check.def file version of 18/12/2021**

Datablock P21c\_a - ellipsoid plot

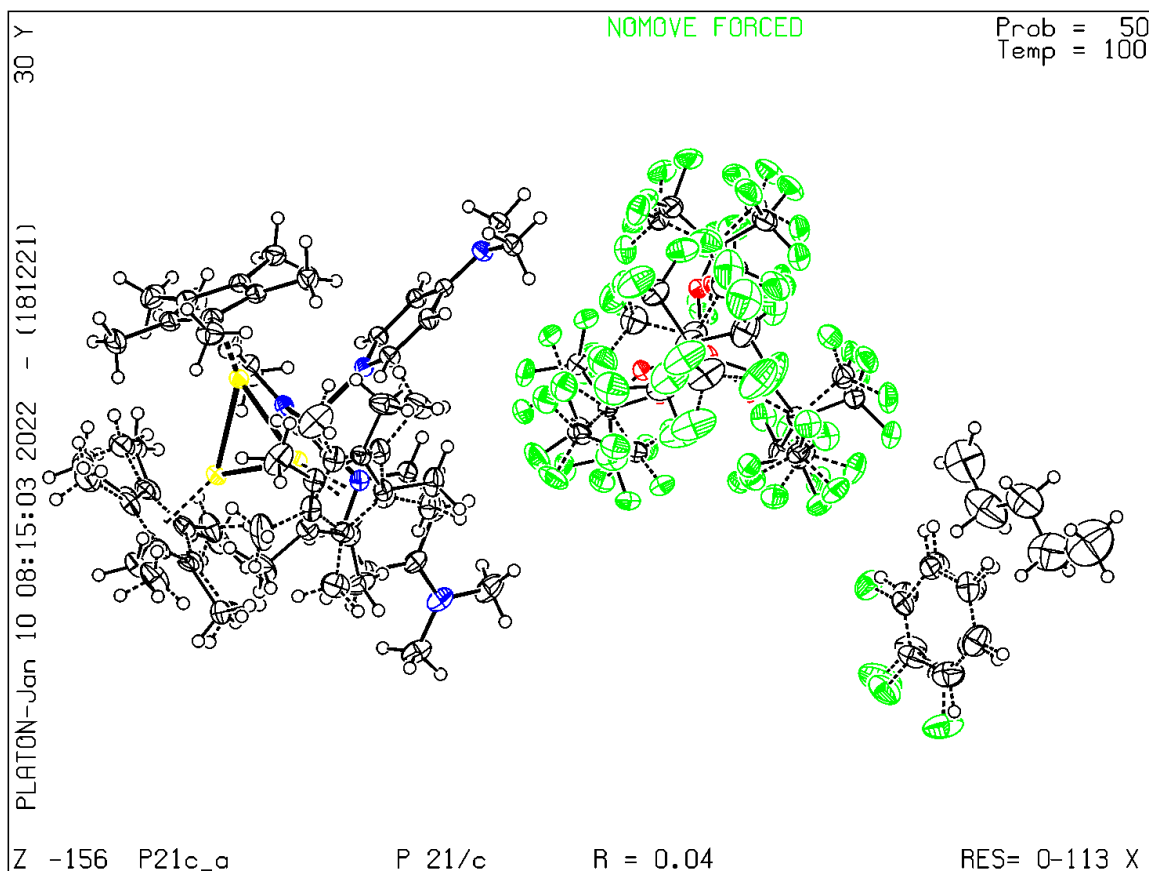

Supplement: Supplementary file 4 [file c6b9ece5bc3b006f4ce6417e.pdf]
